# Supplementary material for: Association of alcohol intake with risk of diabetic retinopathy: a meta-analysis of observational studies
Source: PubMed Central journal article supplement (PMC5428369; doi:10.1038/s41598-017-00034-w), 2017-01-31
Supplement: 41598_2017_34_MOESM1_ESM.pdf [file 41598_2017_34_MOESM1_ESM.pdf]

## Association of alcohol intake with risk of diabetic retinopathy: a meta-analysis of observational studies

Wei Zhu <sup>1, †</sup>, Yi-Fang Meng <sup>1, †</sup>, Yan Wu <sup>2</sup>, Ming Xu <sup>1</sup>, and Jiong Lu <sup>1,\*</sup>

**Supplemental Table 1. Quality Scales of Study Methodology**

| Author, year         | A | B | C | D | E | F | G | H | I | Total |
|----------------------|---|---|---|---|---|---|---|---|---|-------|
| Yang JY, 2013        | 0 | 1 | 0 | 1 | 1 | 1 | 1 | 0 | 1 | 6     |
| Xu L, 2009           | 1 | 1 | 1 | 1 | 1 | 1 | 1 | 0 | 0 | 7     |
| Moss SE,1994         | 1 | 1 | 1 | 1 | 1 | 1 | 1 | 0 | 1 | 8     |
| Lee CC, 2010         | 1 | 1 | 1 | 1 | 0 | 1 | 1 | 1 | 1 | 8     |
| Kohner EM, 1998      | 1 | 1 | 0 | 1 | 1 | 1 | 0 | 1 | 0 | 6     |
| Hirai FE, 2007       | 0 | 1 | 0 | 1 | 1 | 1 | 0 | 0 | 0 | 4     |
| Harjutsalo V, 2014   | 0 | 1 | 0 | 1 | 0 | 1 | 0 | 0 | 0 | 3     |
| Fenwick EK, 2015     | 0 | 1 | 0 | 1 | 1 | 1 | 1 | 1 | 0 | 6     |
| Young RJ, 1984       | 1 | 1 | 1 | 1 | 1 | 1 | 0 | 0 | 0 | 6     |
| Beulens JW,2008      | 0 | 1 | 0 | 1 | 1 | 1 | 1 | 1 | 1 | 7     |
| Rasmidatta S,1998    | 1 | 1 | 0 | 1 | 1 | 1 | 0 | 1 | 0 | 6     |
| Jongsareejit A,2013  | 0 | 0 | 0 | 1 | 1 | 1 | 1 | 0 | 1 | 5     |
| Martín-Merino E,2016 | 1 | 1 | 0 | 0 | 1 | 1 | 1 | 1 | 1 | 7     |
| Giuffrè G, 2004      | 1 | 1 | 0 | 1 | 1 | 1 | 0 | 1 | 0 | 6     |
| Tseng ST, 2015       | 1 | 1 | 1 | 1 | 1 | 1 | 0 | 0 | 0 | 6     |

(A) Define the study design, (B) List inclusion and exclusion criteria for all the participants; (C) Indicate study period and follow-up duration; (D) Diagnosis of DR was based on fundus examination or Fundus photography; (E) Provided enrollment duration for all the participants; (F) Described the general characteristics, such as age and sex, in all the participant population; (G) Adjusted confusing factors, such as age, gender, DM duration, cardiovascular factors; (H) Stratified alcohol intake into more than three stratifications; (I) If the common influence factors, including age, gender, DM duration, were matched among all the groups. A: case control or cohort study, 1 point and cross-sectional study, 0 point. The rest: Yes, 1 point and No, 0 point.
